# Supplementary material for: Dual antibacterial behavior of a curcumin–upconversion photodynamic nanosystem for efficient eradication of drug-resistant bacteria in a deep joint infection
Source: Royal Society of Chemistry journal article supplement (doi:10.1039/c8tb02493f), 2018-01-01
Supplement: c8tb02493f1.pdf [file c8tb02493f1.pdf]

## Supporting Information

### Dual Antibacterial Behaviors of Curcumin-Upconversion Photodynamic Nanosystem for Efficient Eradicating Drug-Resistant Bacteria in Deep Joint Infection

Jiangjun Liu<sup>a)</sup>, Meng Yu<sup>b)</sup>, Guobo Zeng<sup>c)</sup>, Yuanhe Wang<sup>d)</sup>, Tao Ding<sup>a)</sup>, Xu Yang<sup>d)</sup>,  
Kang Sun<sup>d)</sup>, Javad Parvizi<sup>e)</sup>, Shaoqi Tian<sup>\*d)</sup>

*a, Medical College, Qingdao University, Qingdao 266071, China*

*b, Department of Operating Room, the Affiliated Hospital of Qingdao University, Qingdao 266071, China*

*c, Department of Orthopaedics, the People's Hospital of Xixiu District, Anshun, 561000, China*

*d, Department of Orthopaedics, the Affiliated Hospital of Qingdao University, Qingdao 266071, China*

*e Department of Orthopaedics, Rothman Institute at Thomas Jefferson University, Philadelphia, 19107, USA*

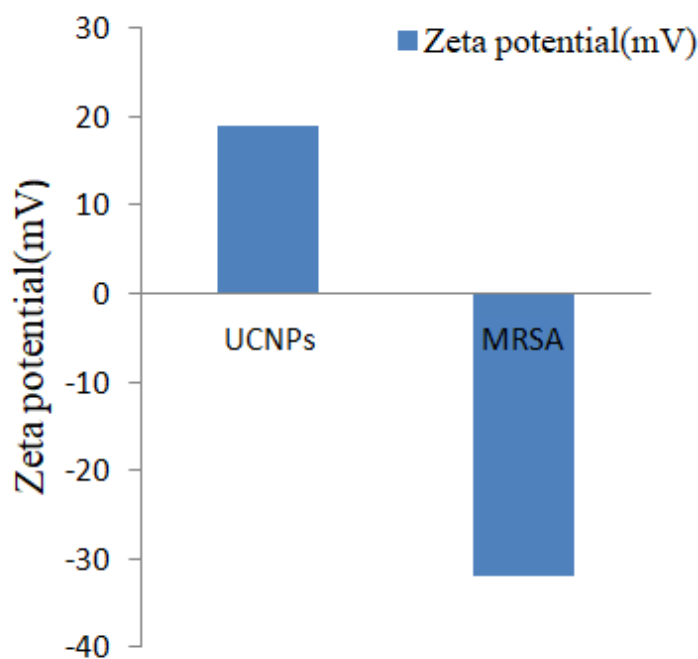

**Fig. S1.** Zeta potential of the Curcumin-UCNP nanocomposites and MRSA.

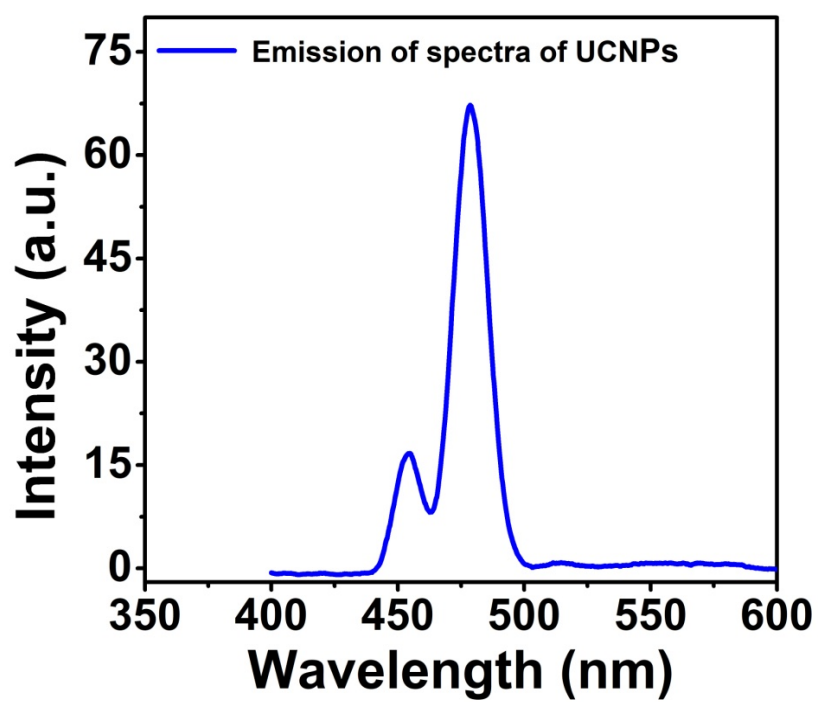

**Fig. S2.** PL spectrum of UCNPs.

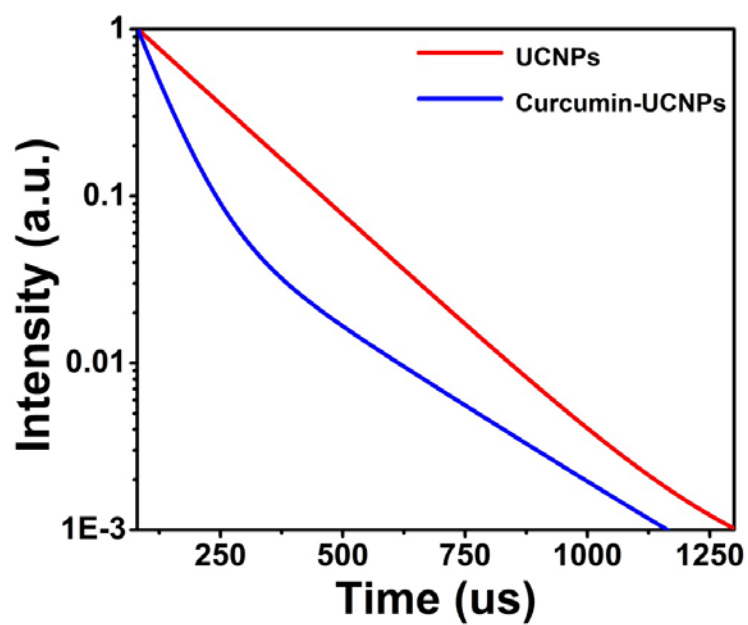

**Fig. S3.** Fluorescence decay curve of UCNPs and Curcumin-UCNPs.

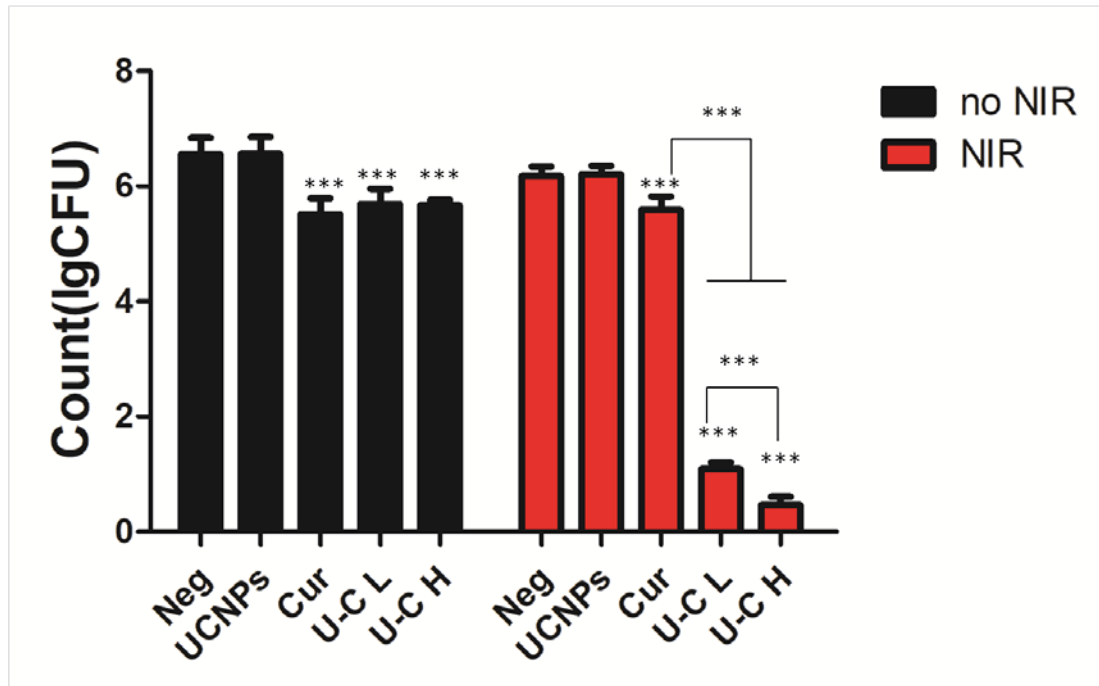

**Fig. S4.** The number of colonies on the agar plates measured by the colony counter. (“Neg” for negative groups, UCNPs for UCNPs groups, “Cur” for curcumin groups “U-C L” for curcumin- UCNPs of low concentration groups, and “U-C H” for curcumin-UCNPs of high concentration groups)

Notes: \*\*\*  $P < 0.01$  compared with the negative group, \*\*\*  $P < 0.01$  compared between the two groups with the marking lines
